# Supplementary material
Source: PubMed Central journal article supplement (PMC3192007)
Supplement: NIHMS308882-supplement-01.pdf [file NIHMS308882-supplement-01.pdf]

## SUPPLEMENTARY INFORMATION

### **Discovery and Biological Characterization of 1-(1*H*-indol-3-yl)-9*H*-pyrido[3,4-*b*]indole as an Aryl Hydrocarbon Receptor Activator Generated by Photoactivation of Tryptophan by Sunlight**

Silvia Diani-Moore, Yuliang Ma, Erin Labitzke, Hui Tao, David Warren, Jared Anderson, Qiuying Chen, Steven Gross and Arleen B. Rifkind

**Supplementary Figure 1.** Synthesis of IPI

**Supplementary Figure 2.** <sup>1</sup>H NMR for synthesized IPI.

**Supplementary Figure 3.** <sup>13</sup>C NMR for synthesized IPI.

**Supplementary Figure 4.** Detection of IPI in culture media

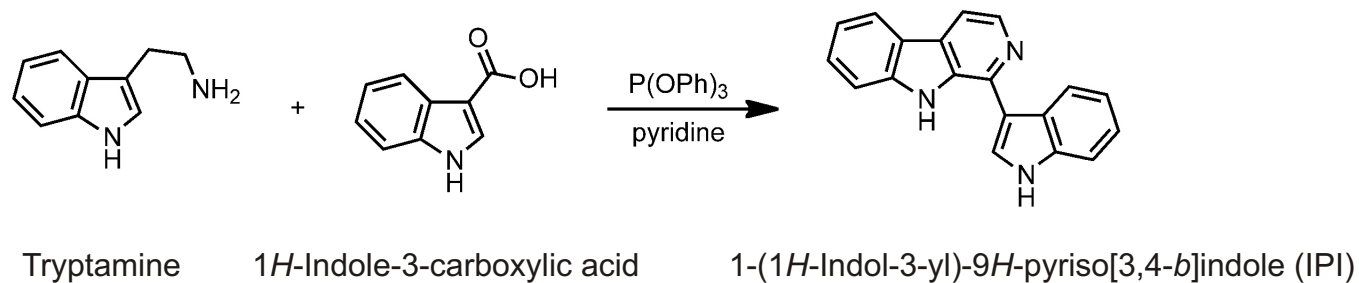

**Supplementary Figure 1.** The novel single step procedure used to synthesize IPI as described in *Results* (section 3.3).

HT2182-031009/2  
CDCl<sub>3</sub>

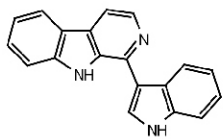

IPI

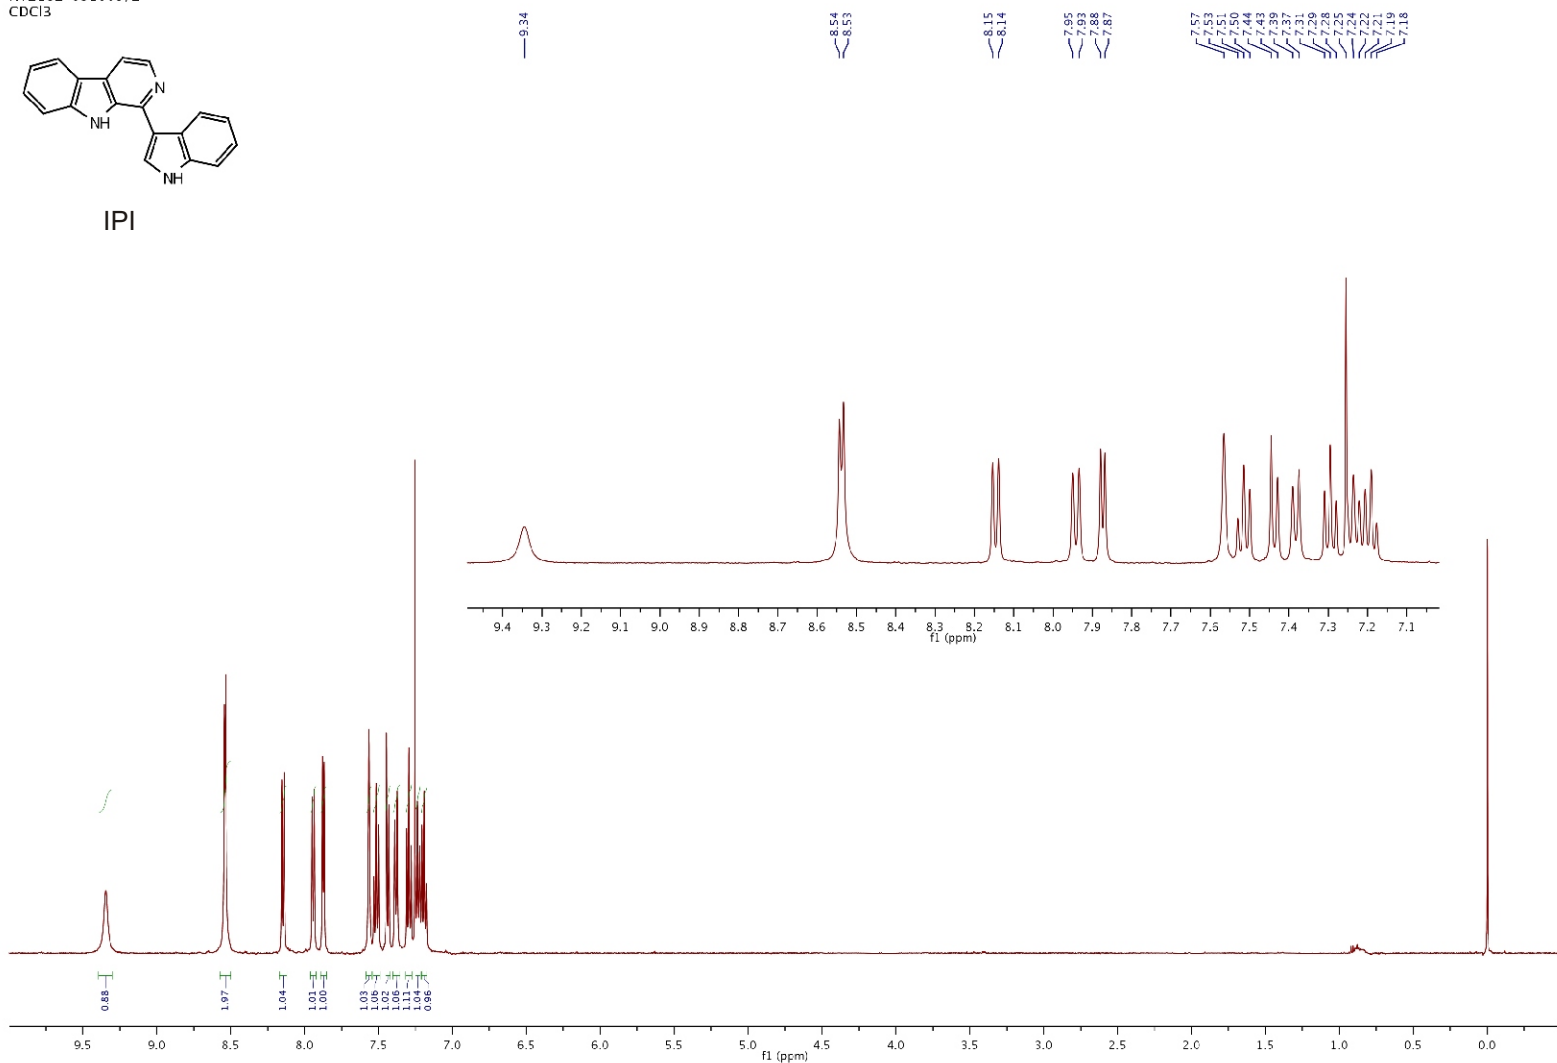

**Supplementary Figure 2.** <sup>1</sup>H NMR for synthesized IPI in CDCl<sub>3</sub>, δ = 9.34 (brs, 1H), 8.58–8.50 (m, 1H), 8.15 (d, *J*=7.9, 1H), 7.94 (d, *J*=7.8, 1H), 7.87 (d, *J*=5.3, 1H), 7.57 (s, 1H), 7.51 (dd, *J*=7.4, 8.1, 1H), 7.44 (d, *J*=8.1, 1H), 7.38 (d, *J*=8.0, 1H), 7.29 (dd, *J*=7.4, 7.8, 1H), 7.24 (dd, *J*=7.5, 7.9, 1H), 7.19 (dd, *J*=7.5, 8.0, 1H).

HT2182-031009/2  
CDCl<sub>3</sub>

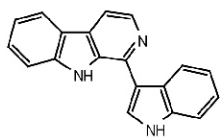

IPI

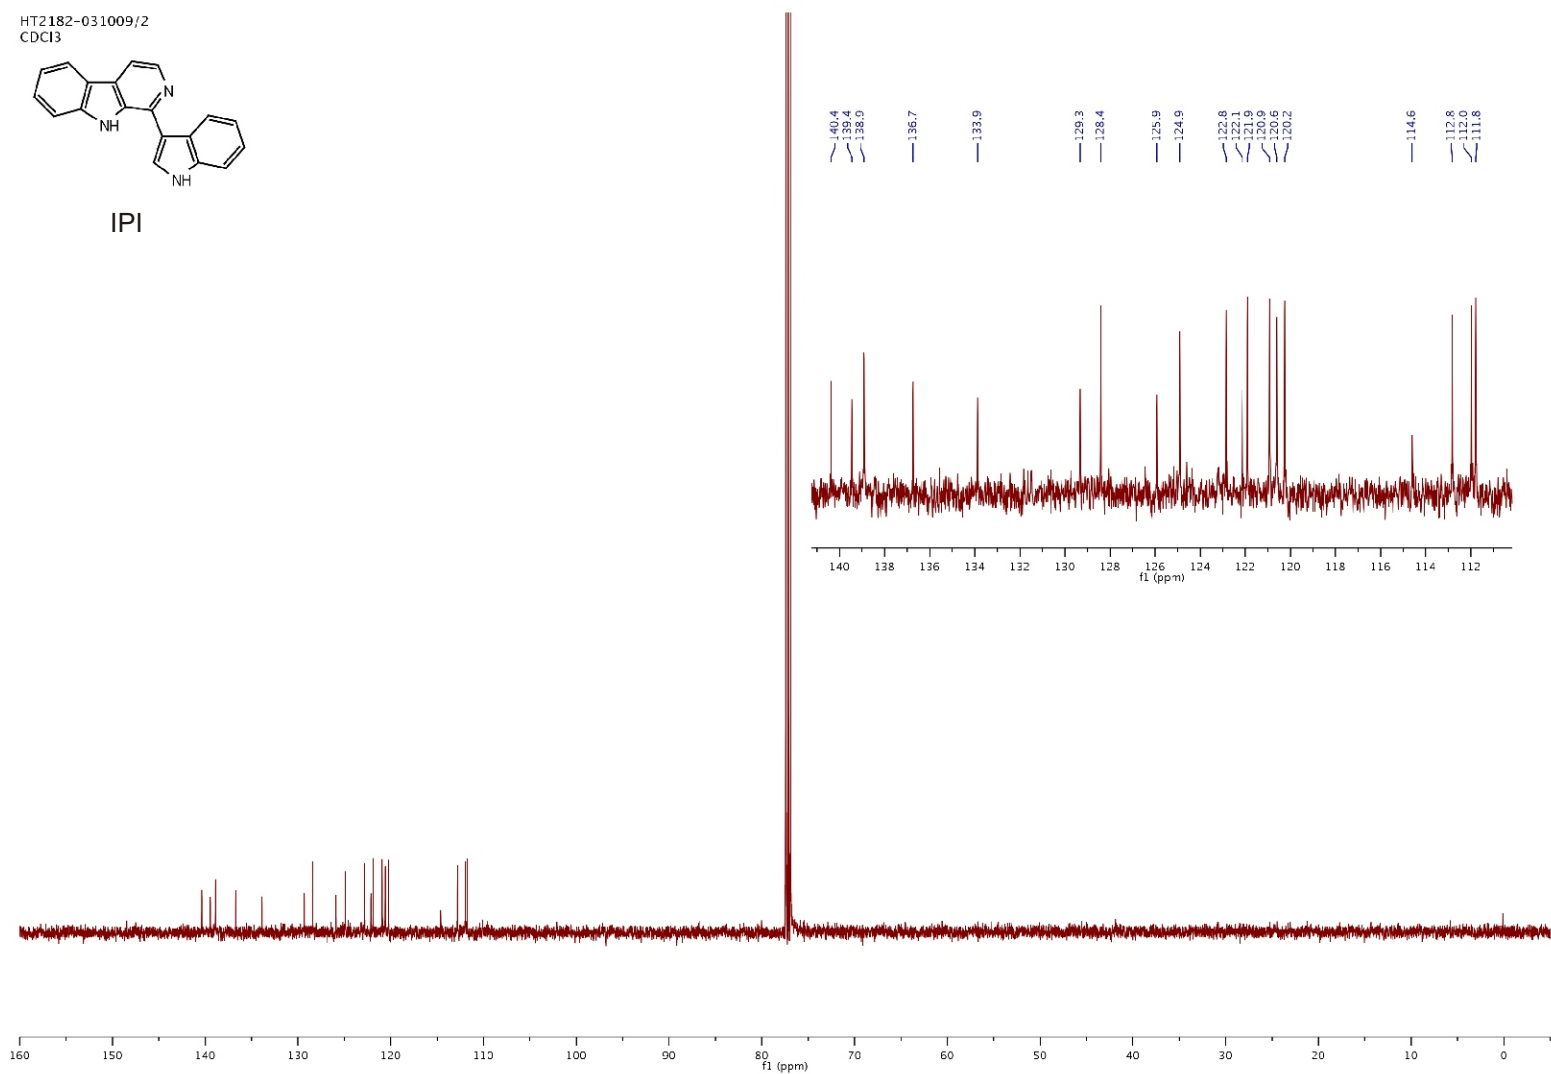

**Supplementary Figure 3.** <sup>13</sup>C NMR for synthesized IPI in CDCl<sub>3</sub>, δ 140.4, 139.4, 138.9, 136.7, 133.9, 129.3, 128.4, 125.9, 124.9, 122.8, 122.1, 121.9, 120.9, 120.6, 120.2, 114.6, 112.8, 112.0, 111.8.

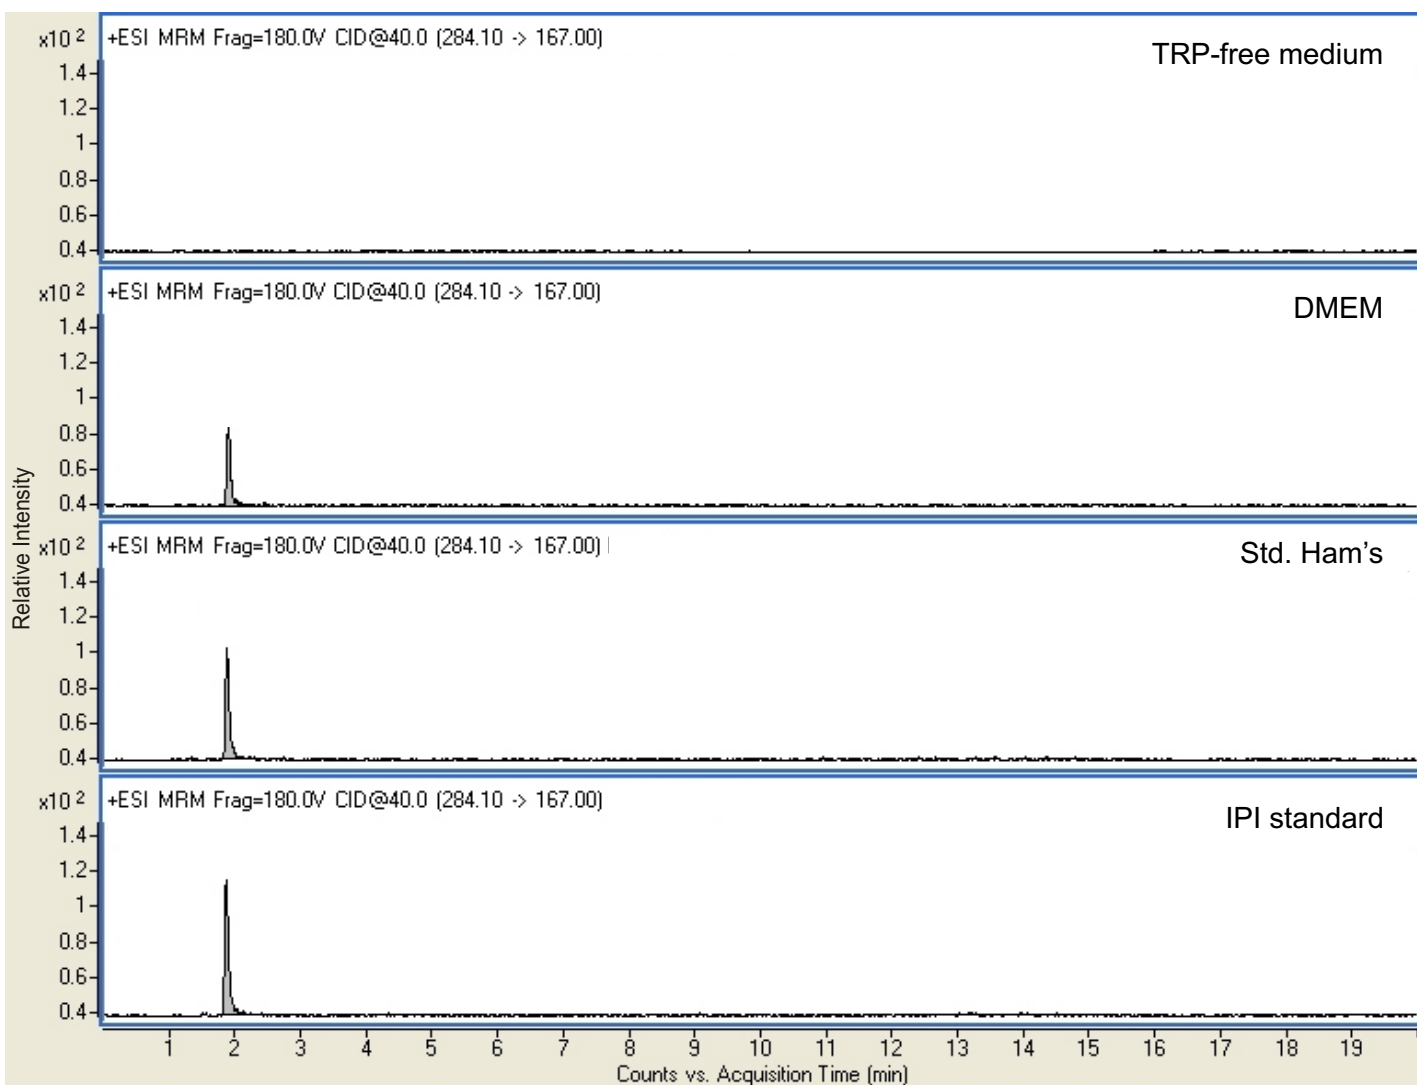

**Supplementary Figure 4.** Representative MRM traces for detection of IPI (transition m/z 284 → 167), in TRP-free medium, DMEM, Std. Ham's and IPI reference (0.41 nM in TRP-free medium), 20  $\mu$ l of medium injected for each, showing that IPI is present in culture media with routine handling under ambient light.
